# Supplementary material
Source: Springer Nature journal article supplement (https://www.springermedizin.de/resource/supplementary/12891_2008_619_MOESM1_ESM.pdf/9506380)

**A**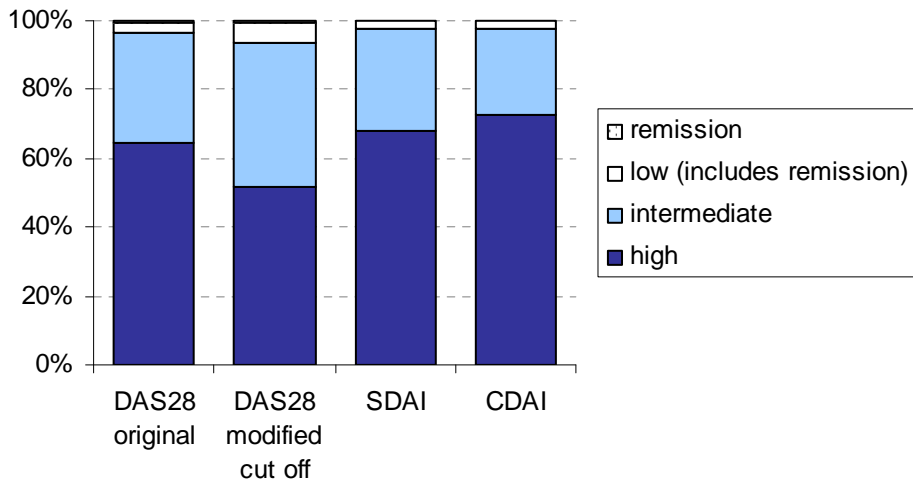**B**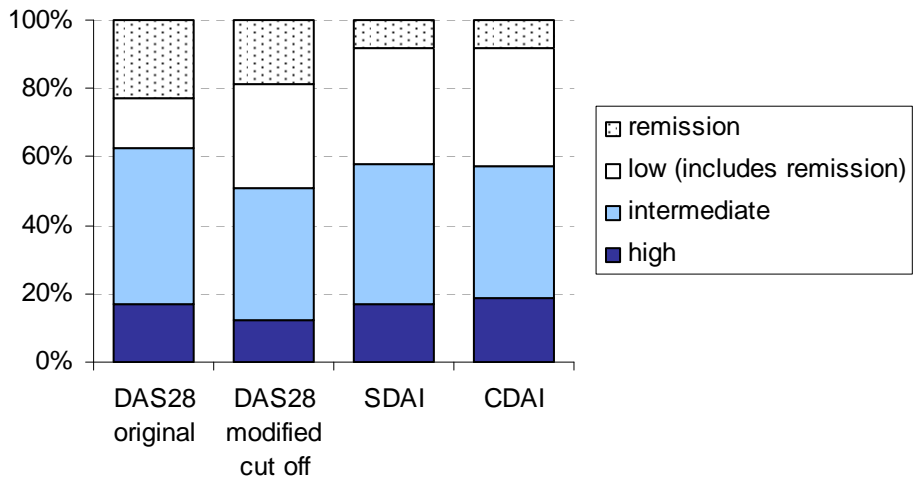

Supplement: MOESM1 [file 9506380]
